# Supplementary material
Source: PubMed Central journal article supplement (PMC5714789)
Supplement: ajtr0009-5048-f5.pdf [file ajtr0009-5048-f5.pdf]

## Role of miR-429 on pancreatic cancer

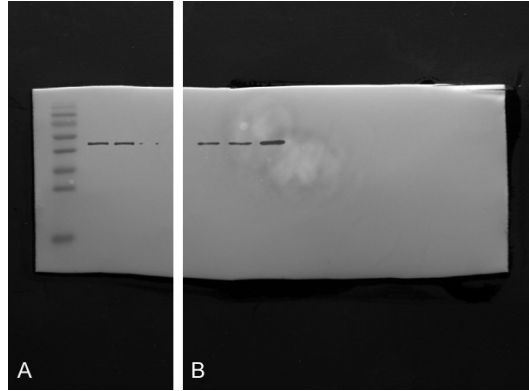

**Supplementary Figure 1.** (A) The protein expression level of PDCD4 in SW1990/GZ cells infected with lentivirus expressing either shPDCD4 or scramble shRNA for 72 h were measured by western blot. (B) Expression level of PDCD4 in tumor tissues were determined by western blot.

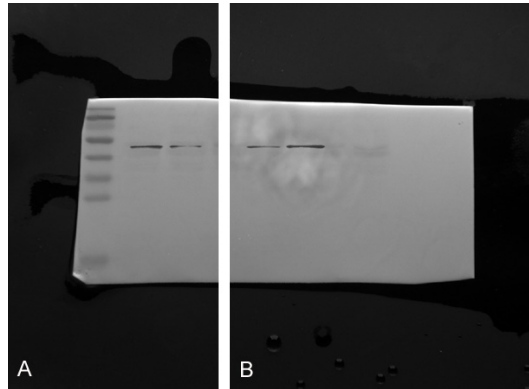

**Supplementary Figure 2.** (A) Western blot analysis of the expression levels of PDCD4 in SW1990 and SW1990/GZ cells. (B) SW1990/GZ cells were transfected with the precursor oligonucleotides (pre-miR-429 and scramble). PDCD4 protein levels were determined by western blot analysis.

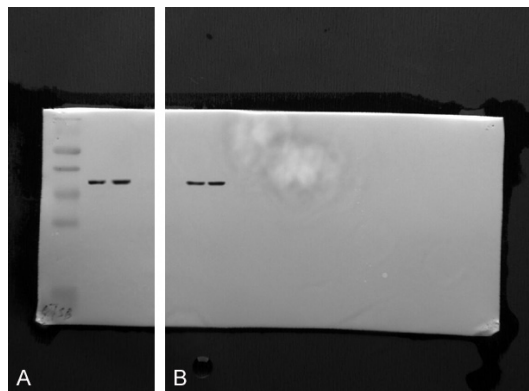

**Supplementary Figure 3.** (A) The blot of GAPDH in SW1990/GZ cells were transfected with the precursor oligonucleotides (pre-miR-429 and scramble) (Figure 2). (B) The blot of GAPDH in SW1990 and SW1990/GZ cells (Figure 1).

## Role of miR-429 on pancreatic cancer

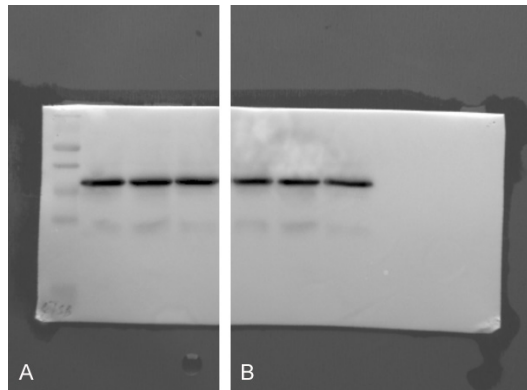

**Supplementary Figure 4.** (A) The blot of GAPDH in in SW1990/GZ cells infected with lentivirus expressing either shPDCD4 or scramble shRNA for 72 h (**Figure 3**). (B) The blot of GAPDH in tumor tissues (**Figure 4**).
